# Supplementary material for: Waste to wealth: atomically dispersed cobalt–nitrogen–carbon from spent LiCoO2
Source: Royal Society of Chemistry journal article supplement (doi:10.1039/d2cc06113a), 2022-12-13
Supplement: d2cc06113a1.pdf [file d2cc06113a1.pdf]

**Supporting Information for**

**Waste-to-wealth: atomically dispersed cobalt-nitrogen-carbon from spent LiCoO<sub>2</sub>**

Miaosen Yang,<sup>a</sup> Yanhui Sun,<sup>a,b</sup> Shuhan Lv,<sup>c</sup> Tian Zhang,<sup>a,b</sup> Lei Yang,<sup>d</sup> Zongge Li,<sup>b</sup> and Guoxin Zhang<sup>b,\*</sup>

a. School of Chemical Engineering, Northeast Electric Power University, Jilin, Jilin 132012, China.

b. Al-ion Battery Research Center, College of Energy Storage Technology, Shandong University of Science and Technology, Qingdao, Shandong 266590, China. Email: [zhanggx@sdust.edu.cn](mailto:zhanggx@sdust.edu.cn)

c. Beijing 21st Century International School, Beijing 100089, China

d. Research Center for Intelligent and Wearable Technology, College of Textiles and Clothing, Qingdao University, Qingdao, Shandong 266071, China

## 1. Experimental Section

### 1.1 Chemicals and reagents

Lithium cobalt oxide ( $\text{LiCoO}_2$ ) was provided by a battery recycling company. Formamide ( $\text{CH}_3\text{NO}$ , purity >99%) was bought from Tianjin Damao Chemical Factory.  $\text{ZnO}$  (99.8%,  $50 \pm 10$  nm),  $\text{In}(\text{OH})_3$  (99% purity),  $\text{Na}_2\text{SnO}_3$  (A.R. grade) were purchased from Aladdin Co., Ltd.  $\text{KOH}$  (95%) was bought from Shanghai Macklin Biochemical Co., Ltd. Absolute ethanol was purchased from Sinopharm Chemical Reagent Co., Ltd. Nafion solution (5.0 wt%, Dupont) and commercial  $\text{Pt/C}$  (20.0 wt.%) were bought from Shanghai Hesen Electric Co., Ltd. Carbon black (BP2000) was purchased from Nanjing Xianfeng Nanomaterial Technology Co., Ltd. All reagents were used as received without further purification.

### 1.2 Preparation of atomically dispersed Co-NC from spent $\text{LiCoO}_2$

Typically, a mixture of 0.2 g  $\text{LiCoO}_2$ , 1.0 g  $\text{ZnO}$ , and 40.0 mL formamide was placed into a 50 mL-packed  $\text{ZrO}_2$  jar and ball milled at 300 Hz for 2 h. The resulting white slurry was then solvothermal-treated at 180 °C for 12 h. The autoclave was allowed naturally cooling down to room temperature before opening the vessel. Subsequently, the as-obtained black, named CoZn-NC180, was thoroughly washed 2-3 times with anhydrous ethanol and dried at 60°C in a vacuum overnight. The dried CoZn-NC180 was then ground in a mortar and heated at 950°C under  $\text{N}_2$  protection for 1 hour with a ramp of 5°C min<sup>-1</sup>. Control sample of Zn-NC950 was synthesized by excluding the addition of  $\text{LiCoO}_2$ , the rest steps were following the synthesis of Co-NC950.

### 1.3. Materials characterizations

Powder X-ray diffraction (XRD) was carried out on a Brüker D8 Advance diffractometer using  $\text{Cu K}\alpha$  radiation ( $\lambda = 0.15406$  nm) at 40 kV and 40 mA. Scanning electron microscopy (SEM) was carried out on an Apreo S HiVac scanning electron microscope at an accelerating voltage of 15 kV. Transmission electron microscopy

(TEM), high-resolution TEM (HRTEM) images, and high angle annular dark-field scanning transmission electron microscopy (HAADF-STEM) images were obtained with an FEI Talos 200S high-resolution transmission electron microscope at an accelerating voltage of 200 kV. Raman spectra were obtained by a DXR2 Raman microscope (Thermo Fisher) using a 532 nm argon laser line as the excitation source. Brunauer-Emmett-Teller (BET) N<sub>2</sub> adsorption-desorption isotherms were performed on a Micromeritics-ASAP2460 to obtain the specific surface area (SSA) of all samples at 77 K, degassed at 300°C before measurement. The pore size distribution maps were determined by using the density functional theory (DFT) method. Thermogravimetric analysis (TGA, STA449F5) was operated under an N<sub>2</sub>/O<sub>2</sub> atmosphere with a heating rate of 5 °C min<sup>-1</sup>. X-ray photoelectron spectroscopy (XPS) analysis was carried out on a PHI 5000 Versaprobe system, using monochromatic Al K $\alpha$  radiation (1486.6 eV). All binding energies were referenced to the C 1s peak at 284.6 eV. X-ray absorption spectra (XAS) were collected on the BL01C1 beamline of the NSRRC. The radiation was monochromatic by a Si (111) bicrystal monochromator. Cobalt *k*-edge XANES data for Co-NC were recorded in fluorescence mode, while the references (Co foil, Co<sub>3</sub>O<sub>4</sub>, CoO, and CoPc) were recorded in transmission mode. Reduction and analysis of XANES and EXAFS data were processed by Athena software. The K<sup>3</sup>-weighted EXAFS spectra in the range of 3-10.0 Å<sup>-1</sup> in K-space were Fourier transformed to give a radial distribution function.

#### 1.4 Electrochemical measurements

The ORR measurements were carried out at room temperature on a typical three-electrode system using a CHI-760e electrochemical workstation (Shanghai Chenhua). A glassy carbon electrode (GCE), a saturated glycerol electrode (SCE), and a graphite rod electrode were used as the working, reference, and counter electrodes, respectively. The catalyst ink was prepared by ultrasonically mixing 5.0 mg catalyst, 1.0 mg carbon black and 10.0  $\mu$ L Nafion solution (5.0 wt%) in 500  $\mu$ L absolute ethanol. The dispersed catalyst ink was then casted onto a glassy carbon rotating ring disc electrode (RRDE) with a loading of approximately 0.25 mg cm<sup>2</sup> for all measured samples. The aqueous

0.1 mol L<sup>-1</sup> KOH solution was used as the electrolyte. O<sub>2</sub> gas was blowing into the electrolyte for at least 30 minutes before ORR measurements to reach O<sub>2</sub> saturation. Before collecting data, all the working electrodes were pre-treated by repeated cyclic voltammetry scans at a rate of 100 mV s<sup>-1</sup> to fully activate the accessible surface of electrodes. Linear sweep voltammetry (LSV) polarization curves were obtained in a 0.1 mol L<sup>-1</sup> KOH electrolyte at a scan rate of 5.0 mV s<sup>-1</sup> at 1600 rpm. ORR stability was determined by the chronoamperometric technique (*i*-t) at 0.4 V vs RHE. All the potentials were converted to the reversible hydrogen electrode (RHE) according to equation (1).

$$E(\text{RHE}) = E(\text{SCE}) + 0.241 \text{ V} + 0.059 \text{ V} \times \text{pH} \quad (1)$$

ORR polarization curves for calculating the transfer electron number (*n*) and hydrogen peroxide yield (H<sub>2</sub>O<sub>2</sub>%) were collected at a rotation rate of 1600 rpm and a scan rate of 5.0 mV s<sup>-1</sup>. The hydrogen peroxide yield (H<sub>2</sub>O<sub>2</sub>%) and the number of electrons transferred (*n*) were determined by the following equations.<sup>1</sup>

$$\text{H}_2\text{O}_2 \% = 200 \times \frac{I_r/N}{I_d + I_r/N} \quad (2)$$

$$n = 4 \times \frac{I_d}{I_d + I_r/N} \quad (3)$$

where *I<sub>d</sub>* is the disc current and *I<sub>r</sub>* is the ring current, the platinum ring has a current collection efficiency (*N*) of 0.37.

### 1.5 Al-air battery (AlAB) measurements

The Al-air battery measurements were carried out on a homemade electrochemical cell with a sandwich structure. Typically, to assemble a gas diffusion electrode (GDE), 5.0 mg catalyst was initially dispersed into a mixed solution of 500 μL ethanol and 10.0 μL 5.0 wt% Nafion to prepare catalyst ink. The resulting catalyst is then coated onto conductive carbon paper to achieve a loading mass of 1.0 mg cm<sup>-2</sup> and the gas diffusion

area is controlled to  $1.0\text{ cm}^2$ . A polished 0.8 mm thick Al plate is used as the anode. The electrolyte was 6.0 M KOH containing additives of  $\text{Na}_2\text{SnO}_3$ ,  $\text{In}(\text{OH})_3$ , and  $\text{ZnO}$ .<sup>2</sup> The power density was obtained by testing the discharge curve on a CHI-760E electrochemical workstation. The rate performance of the AlAB was evaluated by performing electrostatic discharges at different current densities: 1.0, 5.0, 10.0, 20.0, and 50.0  $\text{mA cm}^{-2}$ . The stability and reusability of catalysts were also verified by performing mechanical recharging, *i.e.*, replacing the Al anode after the battery ending.

## 2. Supplementary Figures

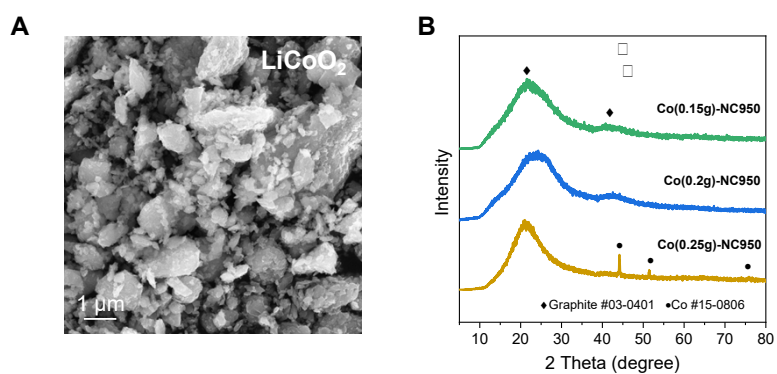

**Figure S1.** (A) SEM of  $\text{LiCoO}_2$ . (B) XRD of Co-NC950 with different  $\text{LiCoO}_2$  usage.

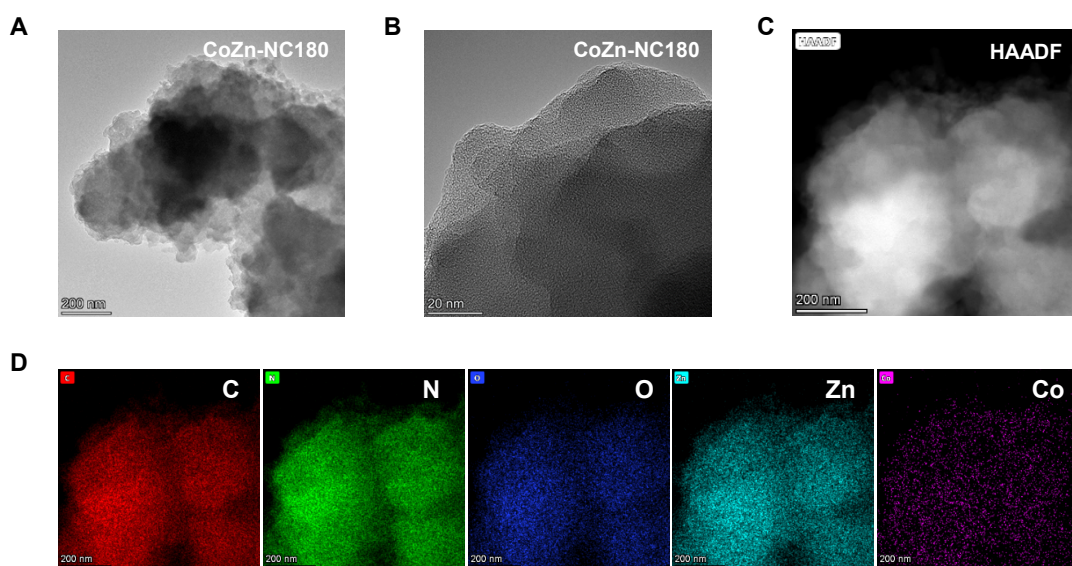

**Figure S2.** (A) TEM, (B) HRTEM, and (C) HAADF-STEM image, and (D) EDS mapping images of CoZn-NC180.

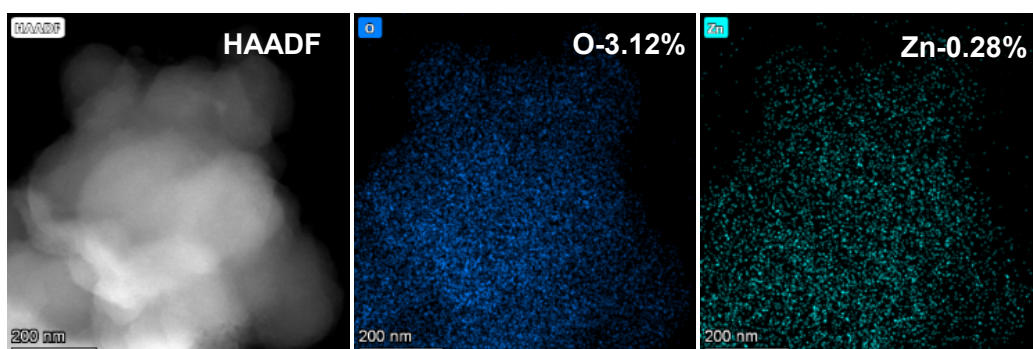

**Figure S3.** HAADF-STEM image, and EDS mapping images of Co-NC950.

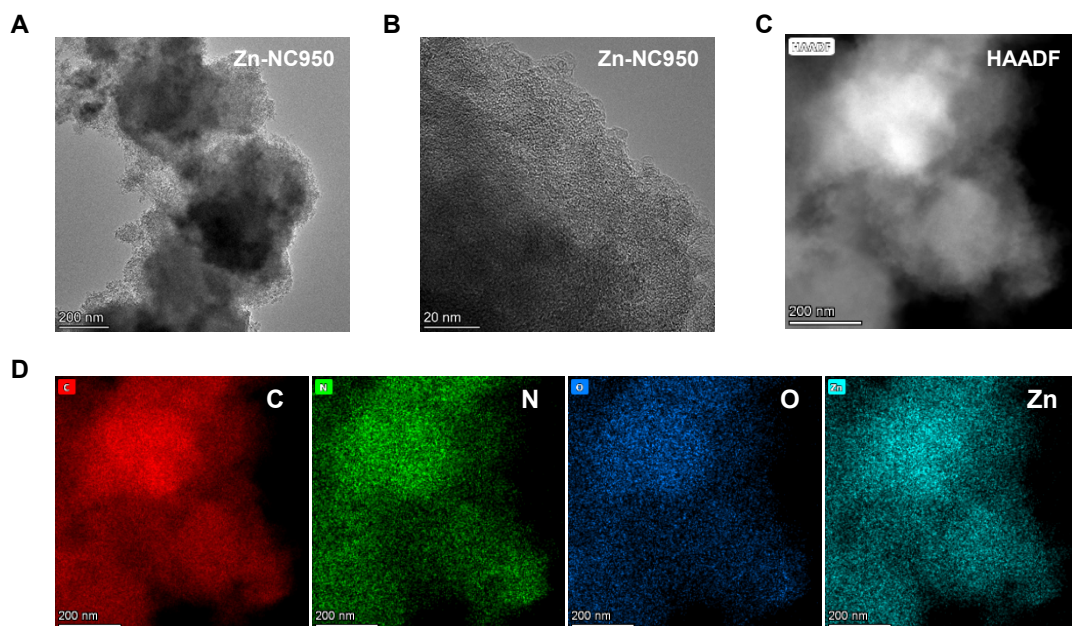

**Figure S4.** (A) TEM, (B) HRTEM, and (C) HAADF-STEM image, and (D) EDS mapping images of Zn-NC950.

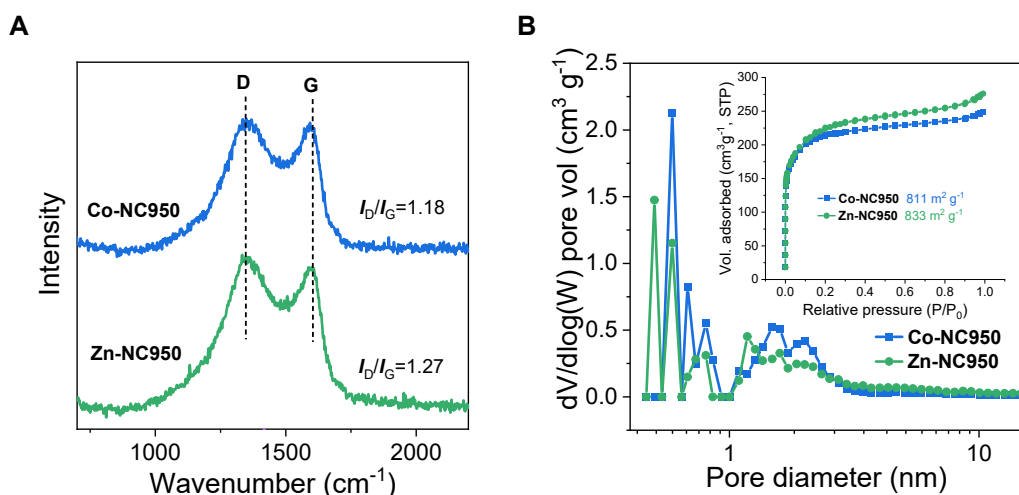

**Figure S5.** (A) Raman spectra of Co-NC950 compared to those of Zn-NC950, CoZn-NC180 and  $\text{LiCoO}_2$ . (B) BET measurements of Co-NC950 and Zn-NC950:  $\text{N}_2$  isotherms and pore distribution curves.

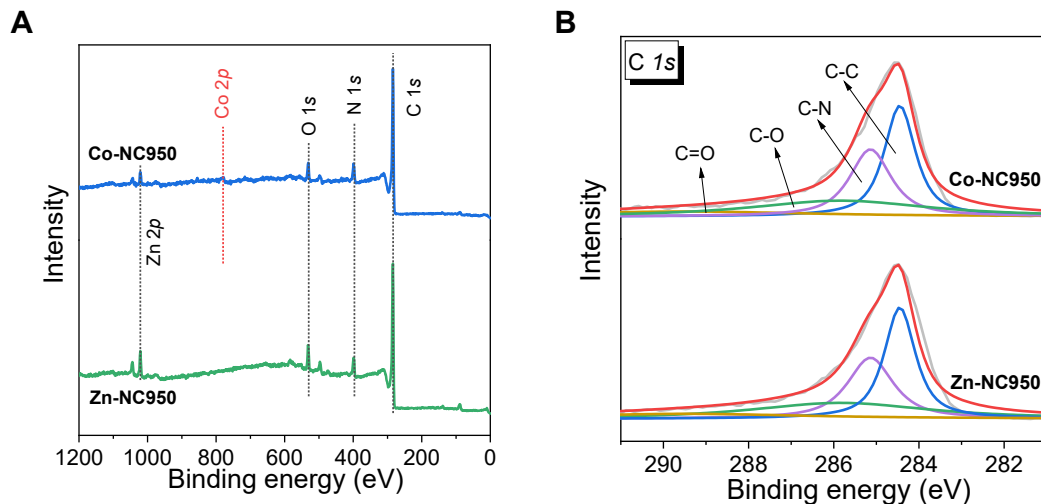

**Figure S6.** X-ray photoelectron spectroscopy (XPS) characterizations of Co-NC950 and Zn-NC950: (A) element survey, (B) C1s spectra.

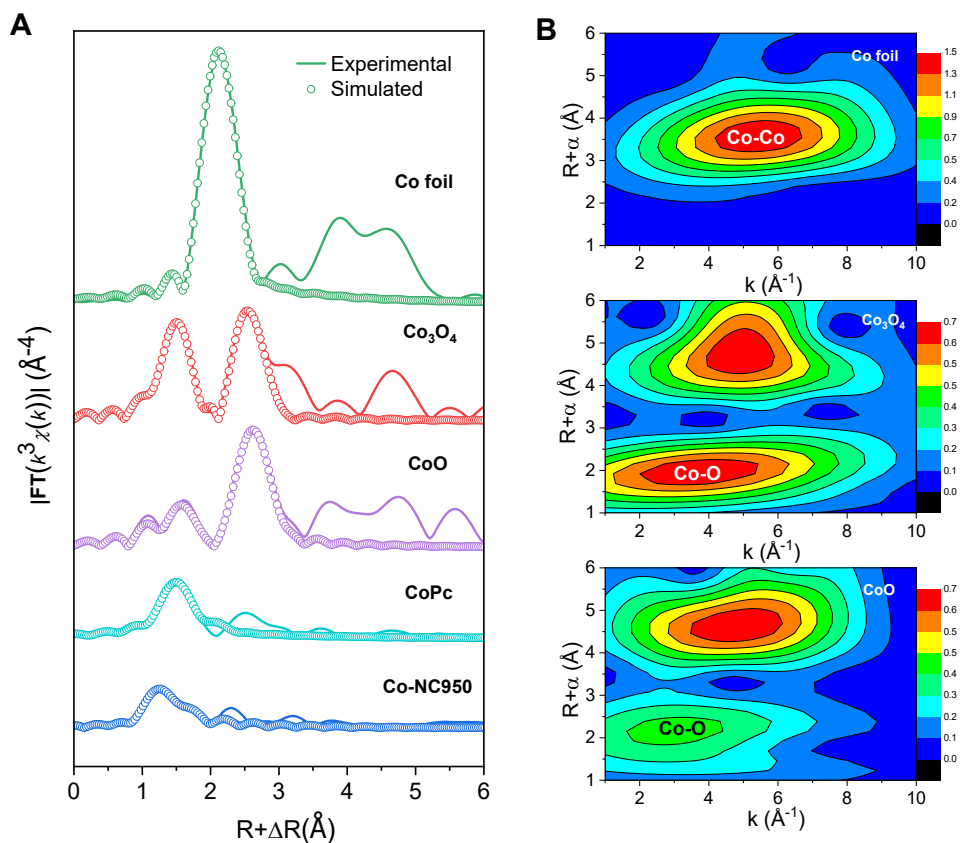

**Figure S7.** (A) Fourier transformed (FT)  $k^3$ -weighted  $\chi(k)$ -function of the EXAFS spectra for the Co K-edge of Co-NC950 and its references, the corresponding Co K-edge EXAFS fitting curves of Co-NC950 and its references were also provided. (B) Wavelet transformed (WT) EXAFS of Co foil,  $\text{Co}_3\text{O}_4$ , and CoO.

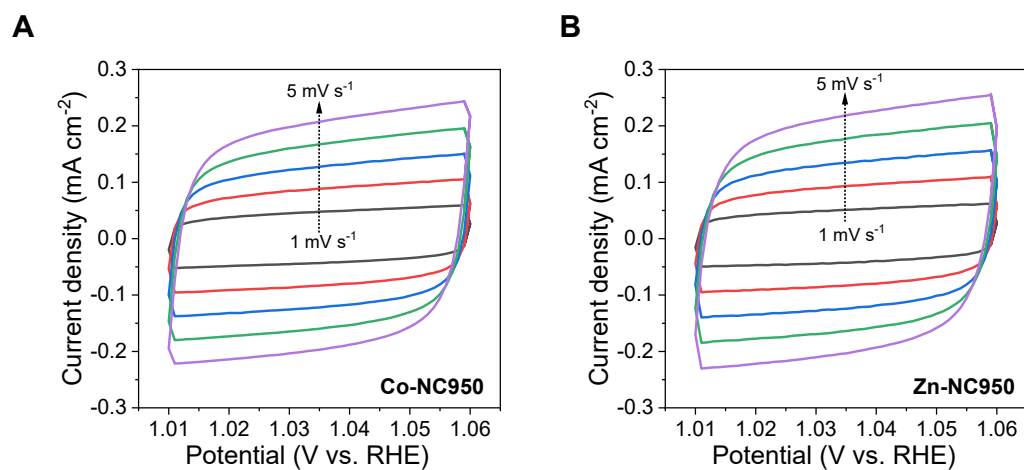

**Figure S8.** CV profiles of (A) Co-NC950 and (B) Zn-NC950 with a potential range of 1.01 to 1.06 V vs. RHE.

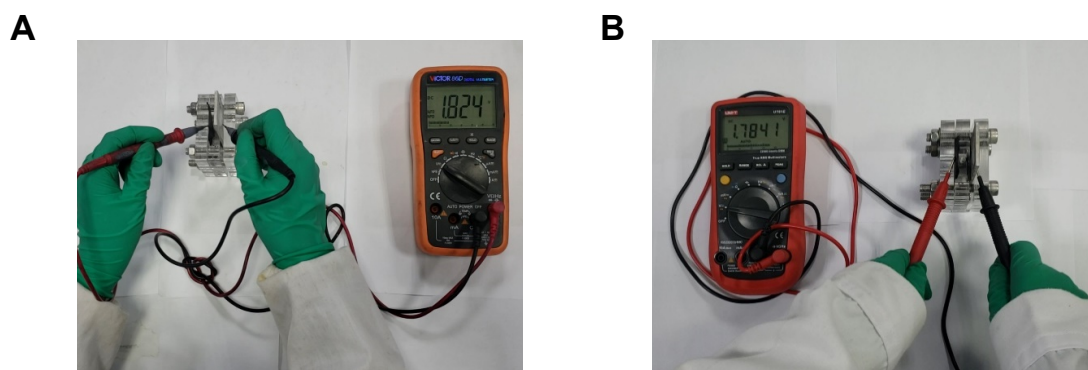

**Figure S9.** Photograph of the open circuit voltage of AAB assembled with (A) Co-NC950, (B) Pt/C.

### 3. Supplementary Tables

**Table S1.** XPS and ICP element analysis of Co-NC950 and Zn-NC950.

| Sample          | at%C  | at%N | at%O | at%Zn | at%Co | ICP-Co<br>wt% | ICP-Zn<br>wt% |
|-----------------|-------|------|------|-------|-------|---------------|---------------|
| <b>Co-NC950</b> | 82.62 | 8.95 | 6.16 | 0.85  | 1.42  | 2.31          | 1.06          |
| <b>Zn-NC950</b> | 80.35 | 9.30 | 8.04 | 2.31  | /     | /             | 4.16          |

**Table S2.** EXAFS fitting results of Co-NC950.

| Sample                             | Shell       | N <sup>a</sup> | R(Å) <sup>b</sup> | $\sigma^2(\text{\AA}^2)$ <sup>c</sup> | $\Delta E_0$ (eV) <sup>d</sup> | R factor      |
|------------------------------------|-------------|----------------|-------------------|---------------------------------------|--------------------------------|---------------|
| <b>Co foil</b>                     | Co-Co       | 9.83           | 2.49              | 0.0062                                | -1.82                          | <b>0.0046</b> |
| <b>CoO</b>                         | Co-O        | 6.09           | 2.11              | 0.0117                                | 4.79                           | <b>0.0109</b> |
|                                    | Co-Co       | 4.79           | 3.10              | 0.0103                                | -5.23                          |               |
| <b>Co<sub>3</sub>O<sub>4</sub></b> | Co-O        | 4.30           | 1.92              | 0.0030                                | 4.05                           | <b>0.0054</b> |
|                                    | Co-Co       | 9.32           | 2.91              | 0.0102                                | 8.41                           |               |
| <b>CoPc</b>                        | Co-N        | 4.06           | 1.91              | 0.0032                                | 4.36                           | <b>0.0073</b> |
| <b>Co-NC950</b>                    | <b>Co-N</b> | <b>4.25</b>    | <b>1.92</b>       | <b>0.0190</b>                         | <b>4.93</b>                    | <b>0.0125</b> |

<sup>a</sup> N: coordination numbers; <sup>b</sup> R: bond distance; <sup>c</sup>  $\sigma^2$ : Debye-Waller factors; <sup>d</sup>  $\Delta E_0$ : the inner potential correction. **R** factor: goodness of fit.

#### 4. Supplementary References

1. Sun, Y.; Li, Z.; Wu, Y.; Tian, J.; Wang, Y.; Yang, M.; Zhang, G., Formamide-soluble solid-state ZnO as Zn source for synthesizing FeCo–NC with ultrahigh oxygen reduction reaction activity. *Mater. Chem. Front.* **2022**, 6 (1), 78-85.
2. Nie, Y.; Gao, J.; Wang, E.; Jiang, L.; An, L.; Wang, X., An effective hybrid organic/inorganic inhibitor for alkaline aluminum-air fuel cells. *Electrochim. Acta* **2017**, 248, 478-485.
